# Supplementary material for: Highly efficient synthesis and characterization of multiarm and miktoarm star-long-branched polymers via click chemistry
Source: Royal Society of Chemistry journal article supplement (doi:10.1039/c5ra02168e), 2015-01-01
Supplement: c5ra02168e1.pdf [file c5ra02168e1.pdf]

## Supporting Information

# Highly Efficient Synthesis and Characterization of Multiarm and Miktoarm Star-Long-Branched Polymers via Click Chemistry

Li Ma,<sup>a</sup> Yichao Lin,<sup>a,b</sup> Haiying Tan,<sup>a,b</sup> Jun Zheng,<sup>a,b</sup> Feng Liu,<sup>a,b</sup> Guangchun Zhang,<sup>a,b</sup> Jie Liu,<sup>\*a</sup> Tao Tang<sup>\*a</sup>

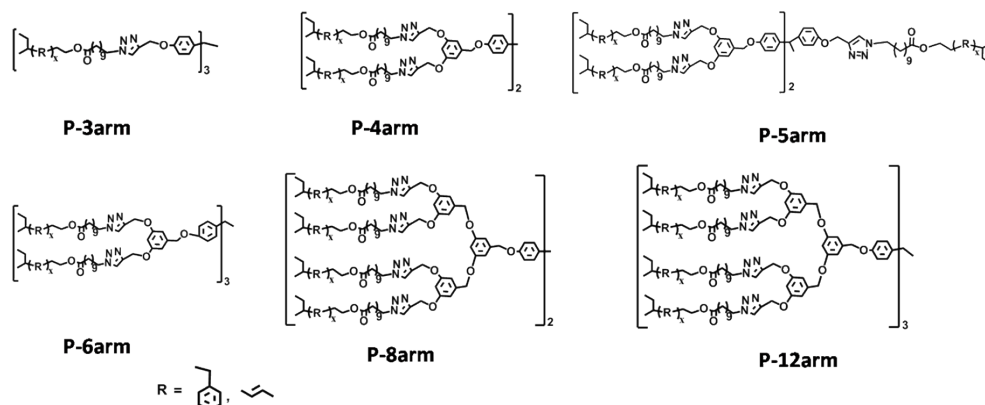

Fig. S1 Macromolecular structures of 3- to 12-arm star polymers.

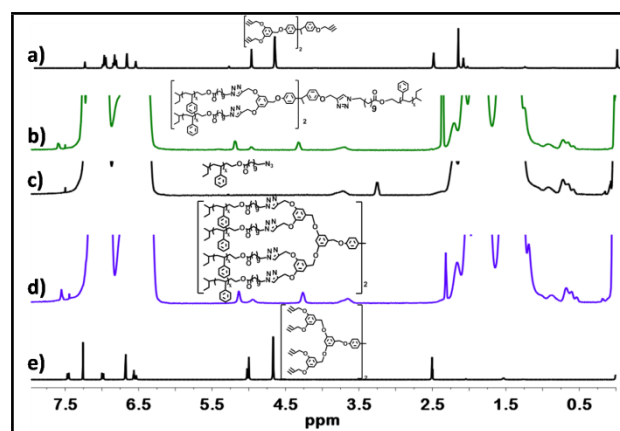

Fig. S2 <sup>1</sup>H NMR of (a) 5-arm alkynyl core, (b) 5-arm star PS, (c) PS-N<sub>3</sub>, (d) 8-arm star PS and (e) 8-arm alkynyl core.

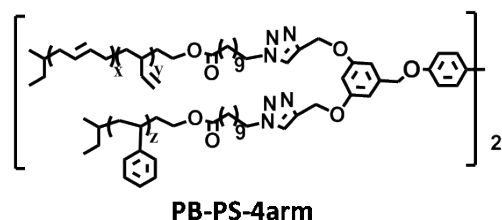

Fig. S3 Macromolecular structure of 4-miktoarm star copolymer.

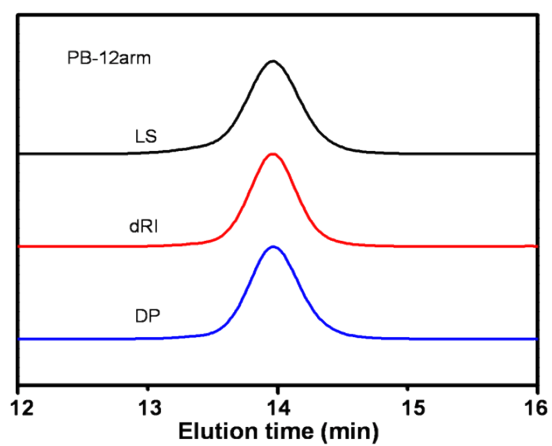

Fig. S4 GPC-MALLS curves by three detectors of 12-arm star PB.

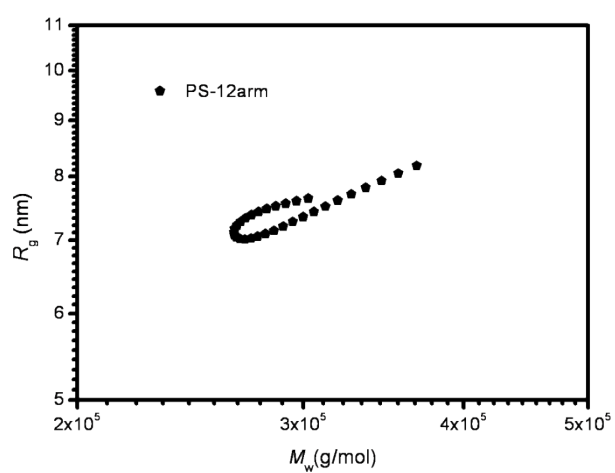

Fig. S5 Molecular weight dependence of radius of gyration ( $R_g$ ) for 12-arm star PS in THF at 35 °C.

**Table S1. Characterization and Dilute Solution Properties of Multiarm and Miktoarm Star Polymers**

| Samples    | GPC                        |                   |                    | GPC-MALLS         |                    |                   |               |                      |                               |
|------------|----------------------------|-------------------|--------------------|-------------------|--------------------|-------------------|---------------|----------------------|-------------------------------|
|            | Purity <sup>a</sup><br>(%) | $M_n$<br>(kg/mol) | $M_w/M_n$<br>(PDI) | $M_w$<br>(kg/mol) | $M_w/M_n$<br>(PDI) | $dn/dc$<br>(mL/g) | $R_g$<br>(nm) | $[\eta]_w$<br>(mL/g) | Branch<br>degree <sup>b</sup> |
| PS-N3      | 100.0                      | 24.1              | 1.03               | 25.2              | 1.02               | 0.1946            | -             | 20.25                | 1.00                          |
| PS-3arm    | 99.0                       | 68.9              | 1.03               | 75.3              | 1.02               | 0.1879            | 3.7           | 36.24                | 2.99                          |
| PS-4arm    | 99.3                       | 87.4              | 1.04               | 99.1              | 1.02               | 0.1895            | 5.3           | 39.03                | 3.93                          |
| PS-5arm    | 99.1                       | 105.2             | 1.03               | 127.3             | 1.03               | 0.1874            | 6.4           | 40.81                | 5.05                          |
| PS-6arm    |                            | 113.7             | 1.03               | 151.4             | 1.02               | 0.1893            | 6.9           | 42.21                | 6.01                          |
| PS-8arm    | 99.0                       | 129.1             | 1.04               | 201.2             | 1.02               | 0.1838            | 7.6           | 40.03                | 7.98                          |
| PS-12arm   | 99.2                       | 169.4             | 1.04               | 302.9             | 1.04               | 0.1840            | 8.2           | 38.68                | 12.02                         |
| PB-N3      | 100.0                      | 20.4              | 1.03               | 14.2              | 1.03               | 0.1370            | -             | 38.76                | 1.00                          |
| PB-3arm    | 99.1                       | 56.2              | 1.03               | 42.1              | 1.03               | 0.1344            | 3.7           | 69.30                | 2.96                          |
| PB-4arm    | 99.2                       | 74.1              | 1.03               | 55.6              | 1.02               | 0.1285            | 6.1           | 77.52                | 3.92                          |
| PB-5arm    | 99.0                       | 90.8              | 1.04               | 70.7              | 1.04               | 0.1335            | 7.9           | 75.44                | 4.98                          |
| PB-6arm    | 99.0                       | 99.5              | 1.04               | 85.2              | 1.04               | 0.1312            | 8.7           | 74.71                | 6.00                          |
| PB-8arm    | -                          | 121.3             | 1.04               | -                 | -                  | -                 | -             | -                    | -                             |
| PB-12arm   | 99.5                       | 154.2             | 1.03               | 165.5             | 1.04               | 0.1303            | 9.3           | 72.85                | 11.67                         |
| PS-PB-4arm | 99.7                       | 103.8             | 1.03               | 72.4              | 1.02               | 0.1564            | 6.2           | 57.72                |                               |

<sup>a</sup>Purity is determined by GPC-RI after fractionation. <sup>b</sup>Branch degree =  $M_w$  (star-P) /  $M_w$  (single-arm-P)
